# Supplementary material
Source: Springer Nature journal article supplement (https://www.springermedizin.de/resource/supplementary/12872_2013_706_MOESM2_ESM.pdf/9430726)
Supplement: MOESM2 [file 9430726]

**Additional file 2 Ratio of Aboriginal to non-Aboriginal risks of coronary angiography, transfer, and coronary angiography if transferred**

| Aboriginal status=Yes                                                                | IHD              |         | MI               |         |
|--------------------------------------------------------------------------------------|------------------|---------|------------------|---------|
|                                                                                      | RR (95% CI)      | p value | RR (95% CI)      | p value |
| <b>(i) Receipt of coronary angiography</b>                                           |                  |         |                  |         |
| Model 6                                                                              | 1.01 (0.92-1.11) | 0.779   | 0.95 (0.87-1.04) | 0.254   |
| Model 7                                                                              | 1.00 (0.92-1.09) | 0.959   | 0.98 (0.90-1.06) | 0.621   |
| <b>(ii) Transfer to metropolitan hospital</b>                                        |                  |         |                  |         |
| Model 6                                                                              | 1.03 (0.95-1.12) | 0.431   | 0.99 (0.92-1.07) | 0.790   |
| Model 7                                                                              | 1.01 (0.93-1.09) | 0.854   | 1.00 (0.93-1.07) | 0.903   |
| <b>(iii) Receipt of coronary angiography if transferred to metropolitan hospital</b> |                  |         |                  |         |
| Model 6                                                                              | 0.98 (0.94-1.03) | 0.514   | 0.95 (0.90-1.01) | 0.125   |
| Model 7                                                                              | 0.99 (0.94-1.04) | 0.787   | 0.98 (0.93-1.04) | 0.583   |

Model 6: adjusted for age group, sex, residential area, SES, IHD category (for IHD) or MI type (for MI), 5-year histories of chronic pulmonary disease, diabetes, HF, kidney disease and private insurance but restricted to first event in 2005-09.

Model 7: adjusted for age group, sex, residential area, SES, IHD category (for IHD) or MI type (for MI), 5-year histories of chronic pulmonary disease, diabetes, HF, kidney disease, private insurance, Charlson comorbidity score, smoking and alcohol.

RR=risk ratio with reference group being non-Aboriginal patients; 95% CI=95% confidence interval; HF=heart failure; IHD=ischaemic heart disease; MI=myocardial infarction; SES=socio-economic status
